# Supplementary material for: In situ synthesis of nanostructured Fe3O4@TiO2 composite grown on activated carbon cloth as a binder-free electrode for high performance supercapacitors
Source: Royal Society of Chemistry journal article supplement (doi:10.1039/d1ra04424a), 2021-01-01
Supplement: d1ra04424a1.pdf [file d1ra04424a1.pdf]

## ***Electronic Supplementary Information***

### **In-situ synthesis of nanostructured Fe<sub>3</sub>O<sub>4</sub>@TiO<sub>2</sub> composite grown on activated carbon cloth as a binder-free electrode for high performance supercapacitors**

Hai Wang<sup>a,b\*</sup>, Xingping Xu<sup>a</sup>, and Anne Neville<sup>b</sup>

<sup>a</sup>: College of Mechanical and Electronic Engineering, China University of Petroleum  
(East China), Qingdao, 266555, China

<sup>b</sup>: Institute of Functional Surfaces, School of Mechanical Engineering, University of  
Leeds, Leeds, LS2 9JT, United Kingdom

\*Corresponding author: Hai Wang, E-mail address: mnhw@leeds.ac.uk

Supplementary material is attached in this section to further support research findings. These include the ultraviolet absorption spectroscopy of Fe<sub>3</sub>O<sub>4</sub>/TiO<sub>2</sub>@C product (Figure S1), a local EDX mapping of Fe<sub>3</sub>O<sub>4</sub>/TiO<sub>2</sub>@C electrode of the certain area (Figure S2), integrated CV area and corresponding capacitance of Fe<sub>3</sub>O<sub>4</sub>/TiO<sub>2</sub>@C electrode at the cycle number of 1, 2500, 5000 and 10000 respectively (Table S1), load mass of active material and specific capacitance measured by mass ratio (Table S2).

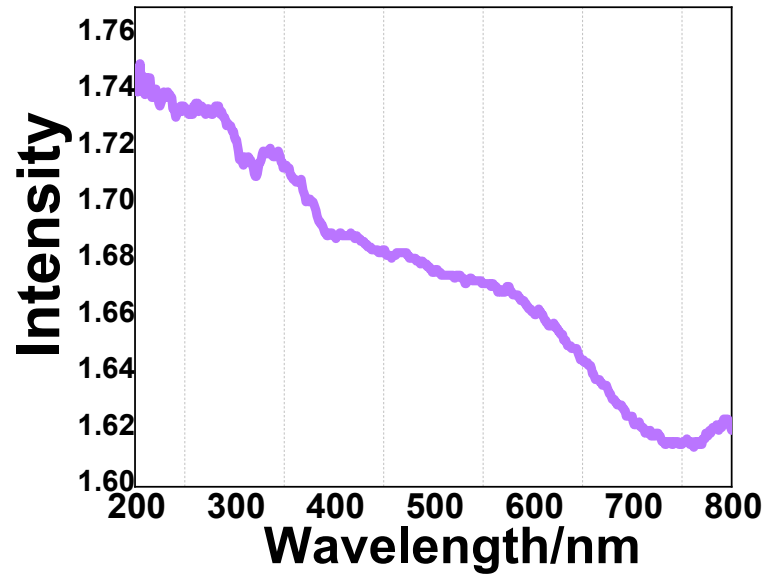

Figure S1 Ultraviolet absorption spectroscopy of  $\text{Fe}_3\text{O}_4/\text{TiO}_2@\text{C}$  electrode

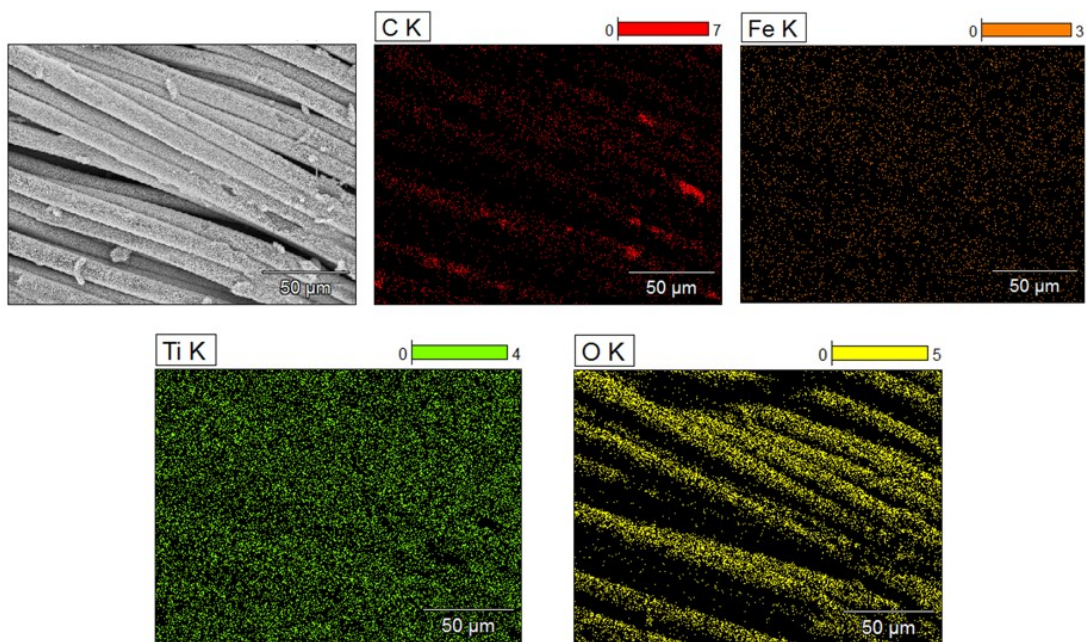

Figure S2 EDX mapping of  $\text{Fe}_3\text{O}_4/\text{TiO}_2@\text{C}$  electrode

**Table S1 Integrated CV area and corresponding capacitance at various cycles**

| Cycle Number | Integrated area (V·A) | Capacitance (mF cm <sup>-2</sup> ) |
|--------------|-----------------------|------------------------------------|
| 1            | 0.00972               | 151.84                             |
| 2500         | 0.00935               | 148.68                             |
| 5000         | 0.00907               | 144.16                             |
| 10000        | 0.00867               | 142.72                             |

**Table S2 Load mass of active material and specific capacitance measured by mass ratio**

| Sample Num. | Load mass (mg) | Capacitance (F) | Current density<br>(A g <sup>-1</sup> ) | Specific<br>Capacitance (F g <sup>-1</sup> ) |
|-------------|----------------|-----------------|-----------------------------------------|----------------------------------------------|
| 1           | 7.32           | 2.101           | 1.0                                     | 287.15                                       |
| 2           | 10.61          | 4.017           | 1.0                                     | 378.62                                       |
| 3           | 7.16           | 3.115           | 1.0                                     | 435.06                                       |
| 4           | 6.20           | 2.018           | 1.0                                     | 325.57                                       |
